# Supplementary material
Source: PubMed Central journal article supplement (PMC7514475)
Supplement: NIHMS1625209-supplement-Supplementary_Table.pdf [file NIHMS1625209-supplement-Supplementary_Table.pdf]

**Supplementary Table 1. Summary of clinical and tumor sample c**

| <b>Patient ID</b> | <b>Age at ICB initiation</b> | <b>Gender</b> | <b>Stage at ICB initiation</b> |
|-------------------|------------------------------|---------------|--------------------------------|
| CGLU111           | 71                           | M             | IV                             |
| CGLU113           | 63                           | M             | IV                             |
| CGLU115           | 63                           | F             | IV                             |
| CGLU116           | 56                           | M             | IV                             |
| CGLU117           | 56                           | M             | IV                             |
| CGLU120           | 58                           | F             | IV                             |
| CGLU121           | 47                           | F             | IV                             |
| CGLU124           | 50                           | F             | IV                             |
| CGLU125           | 76                           | F             | IV                             |
| CGLU126           | 73                           | F             | IV                             |
| CGLU127           | 59                           | F             | IV                             |
| CGLU128           | 65                           | F             | IV                             |
| CGLU129           | 62                           | M             | IV                             |
| CGLU130           | 74                           | F             | IV                             |
| CGLU131           | 57                           | M             | IV                             |
| CGLU132           | 63                           | M             | IV                             |
| CGLU133           | 61                           | M             | IV                             |
| CGLU134           | 72                           | F             | IV                             |
| CGLU135           | 59                           | M             | IV                             |
| CGLU159           | 63                           | F             | IV                             |
| CGLU160           | 87                           | M             | IV                             |
| CGLU162           | 78                           | F             | IV                             |
| CGLU163           | 72                           | M             | IV                             |
| CGLU168           | 88                           | M             | IV                             |
| CGLU169           | 62                           | F             | IV                             |
| CGLU172           | 58                           | F             | IV                             |
| CGLU178           | 68                           | M             | IV                             |
| CGLU180           | 76                           | M             | IV                             |
| CGLU181           | 55                           | M             | IV                             |
| CGLU185           | 56                           | F             | IV                             |
| CGLU187           | 59                           | F             | IV                             |
| CGLU189           | 46                           | F             | IV                             |
| CGLU193           | 65                           | M             | IV                             |
| CGLU197           | 68                           | M             | IV                             |
| CGLU198           | 60                           | F             | IV                             |
| CGLU199           | 61                           | M             | IV                             |
| CGLU200           | 54                           | M             | IV                             |
| CGLU201           | 51                           | M             | IV                             |
| CGLU203           | 65                           | F             | IV                             |
| CGLU208           | 67                           | F             | IV                             |
| CGLU211           | 71                           | F             | IV                             |
| CGLU212           | 57                           | M             | IV                             |
| CGLU213           | 84                           | F             | IV                             |

|         |    |   |    |
|---------|----|---|----|
| CGLU227 | 68 | M | IV |
| CGLU229 | 69 | M | IV |
| CGLU230 | 62 | F | IV |
| CGLU231 | 50 | M | IV |
| CGLU232 | 73 | M | IV |
| CGLU233 | 80 | M | IV |
| CGLU240 | 60 | M | IV |
| CGLU243 | 73 | F | IV |
| CGLU244 | 63 | M | IV |
| CGLU246 | 77 | M | IV |
| CGLU247 | 82 | M | IV |
| CGLU248 | 67 | M | IV |
| CGLU252 | 67 | F | IV |
| CGLU257 | 74 | M | IV |
| CGLU260 | 79 | M | IV |
| CGLU262 | 72 | M | IV |
| CGLU266 | 71 | F | IV |
| CGLU268 | 51 | F | IV |
| CGLU270 | 61 | M | IV |
| CGLU274 | 74 | F | IV |
| CGLU286 | 48 | M | IV |
| CGLU287 | 73 | F | IV |
| CGLU288 | 54 | F | IV |
| CGLU289 | 64 | F | IV |
| CGLU295 | 77 | M | IV |
| CGLU299 | 58 | F | IV |
| CGLU304 | 81 | M | IV |
| CGLU305 | 55 | F | IV |
| CGLU307 | 66 | F | IV |
| CGLU309 | 85 | M | IV |
| CGLU310 | 56 | F | IV |
| CGLU311 | 69 | F | IV |
| CGLU327 | 75 | M | IV |
| CGLU329 | 68 | F | IV |
| CGLU334 | 72 | M | IV |
| CGLU337 | 58 | M | IV |
| CGLU341 | 64 | F | IV |
| CGLU348 | 63 | F | IV |
| CGLU389 | 61 | M | IV |
| CGLU436 | 52 | M | IV |
| CGLU510 | 61 | F | IV |
| CGLU512 | 66 | F | IV |
| CGLU514 | 73 | F | IV |
| CGLU515 | 74 | M | IV |
| CGLU519 | 54 | M | IV |
| CGLU521 | 46 | F | IV |

---

---

Progression-free and overall survival values have been rounded to the closest integer. ICB; immu

## haracteristics

| Smoking Status | Histology               | Anatomic Location |
|----------------|-------------------------|-------------------|
| Former Smoker  | Squamous Cell Carcinoma | liver             |
| Current Smoker | Squamous Cell Carcinoma | R4 lymph node     |
| Former Smoker  | Squamous Cell Carcinoma | lung              |
| Former Smoker  | Squamous Cell Carcinoma | lung              |
| Current Smoker | Adenocarcinoma          | adrenal           |
| Former Smoker  | Adenocarcinoma          | lung              |
| Never Smoker   | Adenocarcinoma          | lung              |
| Never Smoker   | Adenocarcinoma          | lymph node        |
| Former Smoker  | Adenocarcinoma          | lung              |
| Never Smoker   | LCNEC                   | lung              |
| Former Smoker  | Adenocarcinoma          | lung              |
| Never Smoker   | Adenocarcinoma          | adrenal           |
| Former Smoker  | Adenocarcinoma          | soft tissue       |
| Former Smoker  | Adenocarcinoma          | N/A               |
| Never Smoker   | Adenocarcinoma          | lung              |
| Never Smoker   | Adenocarcinoma          | lung              |
| Former Smoker  | Squamous Cell Carcinoma | pleural nodule    |
| Former Smoker  | Adenocarcinoma          | lung              |
| Former Smoker  | Squamous Cell Carcinoma | lung              |
| Former Smoker  | Squamous Cell Carcinoma | pleura            |
| Former Smoker  | Adenocarcinoma          | lung              |
| Former Smoker  | Squamous Cell Carcinoma | lung              |
| Former Smoker  | Squamous Cell Carcinoma | lung              |
| Former Smoker  | Adenocarcinoma          | lung              |
| Former Smoker  | Adenocarcinoma          | lymph node        |
| Former Smoker  | Adenocarcinoma          | lung              |
| Never Smoker   | Other                   | lung              |
| Former Smoker  | Other                   | lung              |
| Former Smoker  | Squamous Cell Carcinoma | lung              |
| Former Smoker  | Adenocarcinoma          | lymph node        |
| Former Smoker  | Adenocarcinoma          | N/A               |
| Never Smoker   | Adenocarcinoma          | lymph node        |
| Former Smoker  | LCNEC                   | lung              |
| Never Smoker   | Squamous Cell Carcinoma | lung              |
| Never Smoker   | Adenocarcinoma          | lung              |
| Never Smoker   | Squamous Cell Carcinoma | chest wall        |
| Never Smoker   | Adenocarcinoma          | lymph node        |
| Current Smoker | Adenocarcinoma          | lung              |
| Former Smoker  | Adenocarcinoma          | iliac wing        |
| Former Smoker  | Adenocarcinoma          | lymph node        |
| Current Smoker | Squamous Cell Carcinoma | lung              |
| Former Smoker  | Adenocarcinoma          | lung              |
| Former Smoker  | Adenocarcinoma          | lung              |

|                |                         |                  |
|----------------|-------------------------|------------------|
| Former Smoker  | Adenocarcinoma          | N/A              |
| Never Smoker   | Adenocarcinoma          | N/A              |
| Never Smoker   | Adenocarcinoma          | N/A              |
| Former Smoker  | Squamous Cell Carcinoma | N/A              |
| Never Smoker   | Adenocarcinoma          | N/A              |
| Former Smoker  | Squamous Cell Carcinoma | N/A              |
| Former Smoker  | Squamous Cell Carcinoma | N/A              |
| Never Smoker   | Adenocarcinoma          | N/A              |
| Former Smoker  | Squamous Cell Carcinoma | brain            |
| Former Smoker  | Squamous Cell Carcinoma | bone             |
| Former Smoker  | Adenocarcinoma          | lung             |
| Former Smoker  | Squamous Cell Carcinoma | lung             |
| Former Smoker  | Adenocarcinoma          | lung             |
| Never Smoker   | Adenocarcinoma          | lung             |
| Former Smoker  | Adenocarcinoma          | liver            |
| Former Smoker  | Adenocarcinoma          | brain            |
| Never Smoker   | Adenocarcinoma          | lung             |
| Former Smoker  | LCNEC                   | lung             |
| Former Smoker  | Adenocarcinoma          | brain            |
| Current Smoker | Squamous Cell Carcinoma | lymph node       |
| Never Smoker   | Adenocarcinoma          | mediastinal mass |
| Former Smoker  | Adenocarcinoma          | lung             |
| Never Smoker   | Adenocarcinoma          | brain            |
| Current Smoker | Adenocarcinoma          | brain            |
| Former Smoker  | Squamous Cell Carcinoma | lymph node       |
| Former Smoker  | Squamous Cell Carcinoma | lymph node       |
| Former Smoker  | Adenocarcinoma          | pleural fluid    |
| Former Smoker  | Adenocarcinoma          | lung             |
| Former Smoker  | Adenocarcinoma          | bone             |
| Former Smoker  | Adenocarcinoma          | lymph node       |
| Current Smoker | Adenocarcinoma          | lymph node       |
| Current Smoker | Adenocarcinoma          | lymph node       |
| Former Smoker  | Adenocarcinoma          | lung             |
| Former Smoker  | Adenocarcinoma          | lung             |
| Former Smoker  | Adenocarcinoma          | lung             |
| Former Smoker  | Adenocarcinoma          | bone             |
| Current Smoker | Adenocarcinoma          | pleura           |
| Former Smoker  | Squamous Cell Carcinoma | lung             |
| Former Smoker  | Adenocarcinoma          | lung             |
| Never Smoker   | Adenocarcinoma          | bone             |
| Former Smoker  | Adenocarcinoma          | liver            |
| Former Smoker  | Adenocarcinoma          | lung             |
| Former Smoker  | Adenocarcinoma          | adnexa           |
| Former Smoker  | Adenocarcinoma          | soft tissue      |
| Former Smoker  | Adenocarcinoma          | lung             |
| Former Smoker  | Adenocarcinoma          | adrenal          |

---

---

line checkpoint blockade, M; male, F; female, LCNEC; large cell neuroendocrine carcinoma, D

| <b>Timepoint at which sample was obtained</b> | <b>Pathologic Tumor Purity (%)</b> | <b>Treatment</b>               | <b>Prior Lines of Systemic Therapy</b> |
|-----------------------------------------------|------------------------------------|--------------------------------|----------------------------------------|
| prior to ICB                                  | 30%                                | Anti-PD1 (nivolumab)           | 1                                      |
| prior to ICB                                  | 40-60%                             | Anti-PD1 (nivolumab)           | 3                                      |
| prior to ICB                                  | 70%                                | Anti-PD1 (nivolumab)           | 2                                      |
| prior to ICB                                  | NA                                 | Dual ICB (anti-PD1+anti-CTLA4) | 1                                      |
| prior to ICB                                  | 80%                                | Anti-PD1 (nivolumab)           | 1                                      |
| prior to ICB                                  | 60-70%                             | Anti-PD1 (nivolumab)           | 2                                      |
| prior to ICB                                  | NA                                 | Anti-PD1 (nivolumab)           | 3                                      |
| prior to ICB                                  | 20-30%                             | Anti-PD1 (nivolumab)           | 1                                      |
| prior to ICB                                  | 20-30%                             | Anti-PD1 (nivolumab)           | 1                                      |
| prior to ICB                                  | 90%                                | Anti-PD1 (nivolumab)           | 1                                      |
| prior to ICB                                  | 70%                                | Anti-PD1 (nivolumab)           | 2                                      |
| prior to ICB                                  | 20-30%                             | Anti-PD1 (nivolumab)           | 3                                      |
| prior to ICB                                  | 30-40%                             | Anti-PD1 (nivolumab)           | 1                                      |
| prior to ICB                                  | 40%                                | Anti-PD1 (nivolumab)           | 1                                      |
| prior to ICB                                  | 50%                                | Anti-PD1 (nivolumab)           | 1                                      |
| prior to ICB                                  | 20%                                | Anti-PD1 (nivolumab)           | 1                                      |
| prior to ICB                                  | 80%                                | Anti-PD1 (nivolumab)           | 4                                      |
| prior to ICB                                  | NA                                 | Anti-PD1 (nivolumab)           | 1                                      |
| prior to ICB                                  | NA                                 | Anti-PD1 (nivolumab)           | 2                                      |
| prior to ICB                                  | 20%                                | Anti-PD1 (nivolumab)           | 1                                      |
| prior to ICB                                  | 50%                                | Anti-PD1 (nivolumab)           | 0                                      |
| prior to ICB                                  | 40%                                | Anti-PD1 (nivolumab)           | 1                                      |
| prior to ICB                                  | 50%                                | Anti-PD1 (nivolumab)           | 1                                      |
| prior to ICB                                  | 80%                                | Anti-PD1 (nivolumab)           | 1                                      |
| prior to ICB                                  | 20%                                | Anti-PD1 (nivolumab)           | 0                                      |
| prior to ICB                                  | 90%                                | Anti-PD1 (nivolumab)           | 3                                      |
| prior to ICB                                  | 20%                                | Anti-PD1 (nivolumab)           | 1                                      |
| prior to ICB                                  | 20%                                | Anti-PD1 (nivolumab)           | 1                                      |
| prior to ICB                                  | 30-50%                             | Anti-PD1 (nivolumab)           | 3                                      |
| prior to ICB                                  | NA                                 | Anti-PD1 (nivolumab)           | 2                                      |
| prior to ICB                                  | 30%                                | Anti-PD1 (nivolumab)           | 2                                      |
| prior to ICB                                  | 80%                                | Anti-PD1 (nivolumab)           | 2                                      |
| prior to ICB                                  | 50%                                | Anti-PD1 (nivolumab)           | 2                                      |
| prior to ICB                                  | 30%                                | Anti-PD1 (nivolumab)           | 1                                      |
| prior to ICB                                  | NA                                 | Anti-PD1 (nivolumab)           | 2                                      |
| prior to ICB                                  | 50%                                | Anti-PD1 (nivolumab)           | 2                                      |
| prior to ICB                                  | NA                                 | Anti-PD1 (nivolumab)           | 2                                      |
| prior to ICB                                  | 70%                                | Anti-PD1 (nivolumab)           | 2                                      |
| prior to ICB                                  | 40%                                | Anti-PD1 (nivolumab)           | 1                                      |
| prior to ICB                                  | 60%                                | Anti-PD1 (nivolumab)           | 1                                      |
| prior to ICB                                  | 40%                                | Anti-PD1 (nivolumab)           | 1                                      |
| prior to ICB                                  | 40%                                | Anti-PD1 (nivolumab)           | 2                                      |
| prior to ICB                                  | 60%                                | Anti-PD1 (nivolumab)           | 0                                      |

|                 |        |                                |   |
|-----------------|--------|--------------------------------|---|
| prior to ICB    | NA     | Anti-PD1 (nivolumab)           | 3 |
| prior to ICB    | 80%    | Anti-PD1 (nivolumab)           | 1 |
| prior to ICB    | 80%    | Anti-PD1 (nivolumab)           | 2 |
| prior to ICB    | 20%    | Anti-PD1 (nivolumab)           | 2 |
| prior to ICB    | 30%    | Anti-PD1 (nivolumab)           | 1 |
| prior to ICB    | 35%    | Anti-PD1 (nivolumab)           | 1 |
| prior to ICB    | 80%    | Anti-PD1 (nivolumab)           | 2 |
| prior to ICB    | 10%    | Anti-PD1 (nivolumab)           | 1 |
| prior to ICB    | 70%    | Anti-PD1 (pembrolizumab)       | 0 |
| prior to ICB    | 60%    | Dual ICB (anti-PD1+anti-CTLA4) | 0 |
| prior to ICB    | 80%    | Anti-PD1 (nivolumab)           | 1 |
| prior to ICB    | 50%    | Dual ICB (anti-PD1+anti-CTLA4) | 1 |
| prior to ICB    | 40%    | Dual ICB (anti-PD1+anti-CTLA4) | 1 |
| prior to ICB    | 40%    | Dual ICB (anti-PD1+anti-CTLA4) | 0 |
| prior to ICB    | 70%    | Anti-PD1 (nivolumab)           | 1 |
| prior to ICB    | 90%    | Anti-PD1 (nivolumab)           | 1 |
| prior to ICB    | 70%    | Anti-PD1 (nivolumab)           | 3 |
| prior to ICB    | 60%    | Dual ICB (anti-PD1+anti-CTLA4) | 0 |
| prior to ICB    | 90%    | Anti-PD1 (nivolumab)           | 1 |
| prior to ICB    | 60%    | Anti-PD1 (pembrolizumab)       | 0 |
| prior to ICB    | 50-60% | Dual ICB (anti-PD1+anti-CTLA4) | 0 |
| prior to ICB    | 60-70% | Anti-PD1 (nivolumab)           | 1 |
| prior to ICB    | 50%    | Anti-PD1 (pembrolizumab)       | 2 |
| prior to ICB    | 90%    | Anti-PD1 (pembrolizumab)       | 0 |
| prior to ICB    | 50%    | Anti-PD1 (nivolumab)           | 1 |
| prior to ICB    | 50%    | Anti-PD1 (nivolumab)           | 1 |
| prior to ICB    | 45%    | Anti-PD1 (nivolumab)           | 1 |
| prior to ICB    | 7%     | Anti-PD1 (pembrolizumab)       | 0 |
| resistant tumor | 20%    | Anti-PD1 (nivolumab)           | 1 |
| prior to ICB    | 70%    | Anti-PD1 (pembrolizumab)       | 0 |
| prior to ICB    | 80%    | Anti-PD1 (pembrolizumab)       | 0 |
| prior to ICB    | 65%    | Anti-PD1 (pembrolizumab)       | 0 |
| prior to ICB    | 35%    | Anti-PD1 (pembrolizumab)       | 0 |
| prior to ICB    | 20%    | Anti-PD1 (pembrolizumab)       | 1 |
| prior to ICB    | 40%    | Anti-PD1 (nivolumab)           | 1 |
| prior to ICB    | 25%    | Anti-PD1 + Chemotherapy        | 1 |
| prior to ICB    | 65%    | Anti-PD1 + Chemotherapy        | 1 |
| prior to ICB    | 45%    | Anti-PD1 (pembrolizumab)       | 1 |
| prior to ICB    | 45%    | Anti-PD1 (pembrolizumab)       | 0 |
| prior to ICB    | 50%    | Anti-PD1 (pembrolizumab)       | 1 |
| resistant tumor | 70%    | Anti-PD1 (nivolumab)           | 2 |
| prior to ICB    | 70%    | Anti-PD1 (nivolumab)           | 1 |
| resistant tumor | 90%    | Anti-PD1 (nivolumab)           | 1 |
| prior to ICB    | 80%    | Anti-PD1 (nivolumab)           | 2 |
| prior to ICB    | 50%    | Anti-PD1 (nivolumab)           | 1 |
| prior to ICB    | 80%    | Anti-PD1 (nivolumab)           | 1 |

---



---

CB; durable clinical benefit, NDB; non durable clinical benefit, PFS; progression-free survival, OS; overall survival

| Clinical Benefit | PFS | PFS censor<br>(0=censored,<br>1=progressed) | OS |
|------------------|-----|---------------------------------------------|----|
| DCB              | 40  | 0                                           | 40 |
| NDB              | 1   | 1                                           | 2  |
| NDB              | 2   | 1                                           | 3  |
| DCB              | 13  | 1                                           | 17 |
| DCB              | 8   | 1                                           | 14 |
| NDB              | 6   | 1                                           | 17 |
| NDB              | 1   | 1                                           | 9  |
| NDB              | 2   | 1                                           | 6  |
| DCB              | 23  | 1                                           | 51 |
| NDB              | 5   | 1                                           | 15 |
| DCB              | 10  | 1                                           | 25 |
| NDB              | 5   | 1                                           | 38 |
| NDB              | 2   | 1                                           | 16 |
| NDB              | 4   | 1                                           | 5  |
| DCB              | 7   | 1                                           | 13 |
| NDB              | 2   | 1                                           | 6  |
| DCB              | 93  | 0                                           | 93 |
| DCB              | 57  | 0                                           | 57 |
| DCB              | 23  | 1                                           | 46 |
| NDB              | 3   | 1                                           | 5  |
| DCB              | 13  | 0                                           | 13 |
| DCB              | 7   | 1                                           | 7  |
| NDB              | 3   | 1                                           | 39 |
| DCB              | 7   | 1                                           | 13 |
| NDB              | 1   | 0                                           | 1  |
| NDB              | 4   | 1                                           | 9  |
| N/A              | 1   | 0                                           | 1  |
| DCB              | 11  | 0                                           | 11 |
| DCB              | 7   | 1                                           | 16 |
| DCB              | 12  | 1                                           | 38 |
| NDB              | 2   | 1                                           | 2  |
| NDB              | 2   | 1                                           | 26 |
| NDB              | 1   | 1                                           | 2  |
| DCB              | 8   | 1                                           | 38 |
| NDB              | 3   | 0                                           | 3  |
| NDB              | 2   | 1                                           | 9  |
| NDB              | 1   | 0                                           | 1  |
| NDB              | 2   | 1                                           | 3  |
| NDB              | 2   | 1                                           | 4  |
| DCB              | 20  | 1                                           | 25 |
| DCB              | 11  | 1                                           | 28 |
| DCB              | 12  | 0                                           | 12 |
| NDB              | 1   | 1                                           | 8  |

|     |    |   |    |
|-----|----|---|----|
| DCB | 10 | 1 | 22 |
| NDB | 2  | 1 | 3  |
| NDB | 6  | 1 | 13 |
| NDB | 4  | 1 | 18 |
| NDB | 2  | 1 | 3  |
| DCB | 14 | 1 | 17 |
| DCB | 13 | 1 | 13 |
| NDB | 2  | 1 | 5  |
| NDB | 5  | 1 | 8  |
| DCB | 20 | 0 | 20 |
| NDB | 3  | 0 | 3  |
| NDB | 2  | 1 | 6  |
| DCB | 10 | 0 | 10 |
| NDB | 1  | 1 | 15 |
| NDB | 1  | 1 | 1  |
| NDB | 2  | 1 | 19 |
| DCB | 23 | 1 | 43 |
| DCB | 21 | 0 | 21 |
| DCB | 29 | 0 | 29 |
| DCB | 7  | 0 | 7  |
| NDB | 6  | 1 | 14 |
| NDB | 3  | 1 | 3  |
| NDB | 1  | 1 | 5  |
| DCB | 15 | 0 | 15 |
| NDB | 4  | 0 | 4  |
| NDB | 3  | 1 | 7  |
| NDB | 2  | 1 | 8  |
| NDB | 4  | 1 | 16 |
| NDB | 2  | 1 | 19 |
| NDB | 1  | 1 | 3  |
| DCB | 14 | 0 | 14 |
| DCB | 16 | 0 | 16 |
| DCB | 14 | 0 | 14 |
| DCB | 14 | 0 | 14 |
| DCB | 29 | 0 | 29 |
| DCB | 14 | 0 | 14 |
| DCB | 13 | 0 | 13 |
| N/A | 3  | 1 | 3  |
| NDB | 3  | 1 | 9  |
| NDB | 3  | 1 | 3  |
| DCB | 11 | 1 | 16 |
| DCB | 9  | 1 | 27 |
| DCB | 10 | 1 | 28 |
| DCB | 19 | 1 | 31 |
| NDB | 2  | 1 | 3  |
| DCB | 10 | 0 | 10 |

---

---

il, NE; non evaluable for PD-L1/CD8 staining due to insufficient tissue, N/A; not available

| OS censor (0=censored,<br>1=DOD) | PD-L1 staining<br>(%, tumor) | CD8+ T cell<br>Density |
|----------------------------------|------------------------------|------------------------|
| 0                                | 60                           | NE                     |
| 1                                | NE                           | NE                     |
| 0                                | NE                           | NE                     |
| 1                                | 70                           | 10                     |
| 1                                | 5                            | NE                     |
| 1                                | 0                            | 20                     |
| 1                                | 5                            | 20                     |
| 1                                | 0                            | 5                      |
| 0                                | 10                           | 10                     |
| 1                                | 0                            | 0                      |
| 1                                | 10                           | 10                     |
| 1                                | 70                           | 10                     |
| 1                                | 80                           | 5                      |
| 0                                | 20                           | 5                      |
| 1                                | 20                           | NE                     |
| 1                                | NE                           | NE                     |
| 0                                | 70                           | 10                     |
| 0                                | NE                           | NE                     |
| 0                                | NE                           | NE                     |
| 1                                | NE                           | NE                     |
| 1                                | NE                           | NE                     |
| 0                                | NE                           | NE                     |
| 0                                | 100                          | 30                     |
| 0                                | 30                           | 20                     |
| 1                                | 100                          | 5                      |
| 1                                | 30                           | 10                     |
| 0                                | 0                            | NE                     |
| 0                                | 1                            | 0                      |
| 0                                | 0                            | NE                     |
| 0                                | 0                            | 20                     |
| 1                                | 0                            | NE                     |
| 1                                | 0                            | NE                     |
| 1                                | 5                            | NE                     |
| 0                                | 0                            | 15                     |
| 1                                | 0                            | 5                      |
| 1                                | 0                            | 0                      |
| 1                                | 0                            | NE                     |
| 0                                | 0                            | 5                      |
| 0                                | NE                           | NE                     |
| 1                                | 10                           | 5                      |
| 0                                | 40                           | 20                     |
| 0                                | 50                           | NE                     |
| 0                                | 50                           | 5                      |

|   |     |     |
|---|-----|-----|
| 0 | 50  | NE  |
| 1 | 70  | NE  |
| 0 | 5   | NE  |
| 1 | 80  | NE  |
| 1 | 100 | NE  |
| 0 | NE  | NE  |
| 0 | NE  | NE  |
| 1 | 100 | 0   |
| 1 | 70  | 0   |
| 0 | 5   | 15  |
| 1 | 10  | 20  |
| 1 | 60  | NE  |
| 1 | NE  | NE  |
| 1 | NE  | NE  |
| 0 | NE  | NE  |
| 0 | 5   | 5   |
| 0 | 100 | 0   |
| 0 | 10  | 5   |
| 0 | 90  | 70  |
| 0 | NE  | NE  |
| 1 | NE  | NE  |
| 1 | 0   | 5   |
| 1 | 0   | 0   |
| 1 | 90  | 20  |
| 1 | 60  | NE  |
| 0 | 90  | 15  |
| 1 | 20  | 5   |
| 0 | 0   | 5   |
| 0 | NE  | NE  |
| 1 | 100 | 30  |
| 0 | 100 | 5   |
| 0 | 80  | 5   |
| 0 | 0   | 100 |
| 0 | 80  | 40  |
| 0 | 70  | 5   |
| 0 | 5   | 1   |
| 0 | 0   | 1   |
| 1 | 0   | 5   |
| 0 | 0   | 5   |
| 0 | 0   | 1   |
| 0 | 50  | 30  |
| 0 | 80  | 20  |
| 0 | 0   | 5   |
| 0 | 5   | 10  |
| 1 | 0   | 10  |
| 0 | 1   | 20  |

---

---
